# Supplementary material for: Merlin: A Vision Language Foundation Model for 3D Computed Tomography
Source: PubMed Central journal article supplement (PMC11230513; doi:10.21203/rs.3.rs-4546309/v1), 2024-06-28
Supplement: NIHPPrs4546309V1-supplement-1.pdf [file NIHPPrs4546309V1-supplement-1.pdf]

## Supplementary

| Split      | 2D Slices  | CTs    | Findings Tokens | ICD9 Codes | ICD10 Codes | Patients |
|------------|------------|--------|-----------------|------------|-------------|----------|
| Train      | 6,387,231  | 15,331 | 6,036,645       | 577,998    | 1,261,561   | 11,010   |
| Validation | 2,099,217  | 5,060  | 1,985,925       | 178,194    | 379,733     | 3,644    |
| Test       | 2,142,061  | 5,137  | 2,029,001       | 197,821    | 399,986     | 3,667    |
| Total      | 10,628,509 | 25,528 | 10,051,571      | 954,013    | 2,041,280   | 18,321   |

Table 1: Summary of pretraining dataset splits.

| Demographic                         | Patients (n = 18,321) | Value     |
|-------------------------------------|-----------------------|-----------|
| <b>Age</b>                          | -                     | 53.8±19.5 |
| <b>Gender</b>                       |                       |           |
| Female                              | 10,254                | 55.97%    |
| Male                                | 8,065                 | 44.02%    |
| <b>Self-Reported Race/Ethnicity</b> |                       |           |
| Non-Hispanic White                  | 8,660                 | 47.27%    |
| Asian                               | 2,673                 | 14.59%    |
| Black                               | 952                   | 5.20%     |
| Hispanic White                      | 515                   | 2.81%     |
| Pacific Islander                    | 294                   | 1.60%     |
| Native American                     | 65                    | 0.35%     |
| Unknown                             | 5,127                 | 27.98%    |
| <b>Patient Class</b>                |                       |           |
| Inpatient                           | 6,834                 | 37.31%    |
| Emergency Services                  | 6,388                 | 34.87%    |
| Outpatient                          | 2,959                 | 16.16%    |
| Observation                         | 1,452                 | 7.93%     |

Table 2: Internal dataset characteristics. The age value is provided as mean ± standard deviation. All other values are provided as percentages of the total patients (n = 18,321).

| Demographic                         | Patients (n = 5,804) | Value     |
|-------------------------------------|----------------------|-----------|
| <b>Age</b>                          | -                    | 61.4±16.5 |
| <b>Gender</b>                       |                      |           |
| Female                              | 2,982                | 51.38%    |
| Male                                | 2,822                | 48.62%    |
| <b>Self-Reported Race/Ethnicity</b> |                      |           |
| Non-Hispanic White                  | 4,576                | 78.84%    |
| Black                               | 270                  | 4.65%     |
| Hispanic White                      | 198                  | 2.76%     |
| Asian                               | 87                   | 1.50%     |
| Native American                     | 31                   | 0.53%     |
| Pacific Islander                    | 4                    | 0.07%     |
| Unknown                             | 602                  | 10.37%    |

Table 3: External dataset characteristics. The age value is provided as mean ± standard deviation. All other values are provided as percentages of the total patients (n = 5,804).

| Encoder     | Init | Labels | Stem<br>KS <sub>z</sub> /<br>Stride <sub>z</sub> | All Phecodes<br>N=691, Prev=3.1% |             |            |           | Upper Quartile<br>by Prevalence<br>N=173; Prev=8.7% |             | Lower Quartile<br>by Prevalence<br>N=173, Prev=0.6% |       |       |       |
|-------------|------|--------|--------------------------------------------------|----------------------------------|-------------|------------|-----------|-----------------------------------------------------|-------------|-----------------------------------------------------|-------|-------|-------|
|             |      |        |                                                  | Phecodes w/ AUC                  |             |            |           | AUROC                                               | AUPRC       | AUROC                                               | AUPRC | AUROC | AUPRC |
|             |      |        |                                                  | AUROC                            | AUPRC       | >0.85      | >0.9      | AUROC                                               | AUPRC       | AUROC                                               | AUPRC | AUROC | AUPRC |
| SwinUNETR   | MAE  | EHR    | 4/4                                              | .736                             | .088        | 52         | 8         | .734                                                | .207        | .738                                                | .029  |       |       |
| ConvNeXt-T  | I3D  | EHR    | 7/2                                              | .768                             | .106        | 115        | 20        | .765                                                | .239        | .764                                                | .035  |       |       |
| ConvNeXt-S  | I3D  | EHR    | 7/2                                              | .761                             | .102        | 105        | 14        | .760                                                | .234        | .750                                                | .031  |       |       |
| ConvNeXt-B  | I3D  | EHR    | 7/2                                              | .773                             | .110        | 132        | 28        | .768                                                | .244        | .766                                                | .036  |       |       |
| ConvNeXt-B* | I3D  | EHR    | 3/2                                              | .789                             | .131        | 180        | 46        | .784                                                | .270        | .781                                                | .052  |       |       |
| ResNet50    | I3D  | EHR    | 3/1                                              | .798                             | .137        | 226        | 72        | .787                                                | .280        | .797                                                | .049  |       |       |
| ResNet152   | I3D  | EHR    | 7/2                                              | .798                             | .135        | 221        | 65        | .785                                                | .272        | .796                                                | .050  |       |       |
| ↓           | I3D  | EHR    | 3/2                                              | .798                             | .136        | 221        | 74        | .788                                                | .275        | .792                                                | .049  |       |       |
|             | I3D  | EHR    | 3/1                                              | .801                             | .140        | 235        | 79        | .789                                                | .279        | .801                                                | .054  |       |       |
| (Merlin)    | I3D  | MTL    | 3/1                                              | <b>.812</b>                      | <b>.142</b> | <b>259</b> | <b>93</b> | <b>.804</b>                                         | <b>.290</b> | <b>.808</b>                                         | .050  |       |       |

Table 4: *Phenotype classification*. We only include phenotypes that have more than 20 positive examples in the test set in order to ensure a meaningful measure of performance. \* in ConvNext-B\* indicates that instead of inflating the z dimension to a size equal to the 2D kernel height and width of 7, the kernel is inflated to a depth of 3.

| Init | Labels | Split<br>Text | Stem<br>KS <sub>z</sub> /<br>Stride <sub>z</sub> | All Phecodes<br>N=691, Prev=3.1% |             |            |            | Upper Quartile<br>by Prevalence<br>N=173; Prev=8.7% |             | Lower Quartile<br>by Prevalence<br>N=173, Prev=0.6% |             |       |       |
|------|--------|---------------|--------------------------------------------------|----------------------------------|-------------|------------|------------|-----------------------------------------------------|-------------|-----------------------------------------------------|-------------|-------|-------|
|      |        |               |                                                  | Phecodes w/ AUC                  |             |            |            | AUROC                                               | AUPRC       | AUROC                                               | AUPRC       | AUROC | AUPRC |
|      |        |               |                                                  | AUROC                            | AUPRC       | >0.85      | >0.9       | AUROC                                               | AUPRC       | AUROC                                               | AUPRC       | AUROC | AUPRC |
| I3D  | Staged | ✗             | 3/1                                              | .804                             | .145        | 240        | 84         | .792                                                | .287        | .798                                                | .056        |       |       |
| I3D  | Staged | ✓             | 3/1                                              | .807                             | .146        | 249        | 87         | .795                                                | .291        | .801                                                | .056        |       |       |
| I3D  | MTL    | ✗             | 3/1                                              | <b>.814</b>                      | <b>.153</b> | <b>267</b> | <b>103</b> | <b>.806</b>                                         | <b>.302</b> | .807                                                | <b>.058</b> |       |       |
| Rand | MTL    | ✓             | 3/1                                              | .786                             | .124        | 117        | 46         | .778                                                | .261        | .779                                                | .042        |       |       |
| I3D  | MTL    | ✓             | 3/1                                              | .812                             | .142        | 259        | 93         | .804                                                | .290        | <b>.808</b>                                         | .050        |       |       |

Table 5: *Phenotype classification ablation study*. We perform ablation studies where we examine the impact of I3D initialization, staged training versus multi-task learning (MTL) with EHR and radiology reports, and splitting the report text with every other batch for finer grain contrastive learning.

| Method                | Average F1 Score  |
|-----------------------|-------------------|
| OpenCLIP (Internal)   | .276 [.262, .288] |
| BioMedCLIP (Internal) | .285 [.274, .295] |
| Merlin (Internal)     | .741 [.727, .755] |
| Merlin (External)     | .647 [.607, .678] |
| Merlin (VerSe)        | .767 [.630, .867] |

Table 6: *Zero-shot classification*. The internal and external numbers (first 4 rows) represent averages over the 30 findings for the internal clinical dataset and the external clinical dataset respectively. The bottom row represents F1 score for zero-shot classification of vertebral fractures on the VerSe dataset.

| Init | Labels | Split<br>Text | Average F1 Score         |
|------|--------|---------------|--------------------------|
| I3D  | Report | ✓             | .730 [.714, .744]        |
| I3D  | Staged | ✗             | .669 [.653, .683]        |
| I3D  | Staged | ✓             | <b>.735 [.719, .748]</b> |
| I3D  | MTL    | ✗             | .656 [.640, .671]        |
| Rand | MTL    | ✓             | .698 [.681, .711]        |
| I3D  | MTL    | ✓             | <b>.741 [.727, .755]</b> |

Table 7: *Zero-shot classification ablation study*. We measure zero-shot performance as we vary parameters of I3D versus random initialization, staged training versus multi-task learning (MTL) with EHR and radiology reports, and training with the full findings sections versus using radiology report splitting.

| Task  | Method     | Recall@1    |             |             | Recall@8    |             |             |
|-------|------------|-------------|-------------|-------------|-------------|-------------|-------------|
|       |            | N=32        | N=64        | N=128       | N=32        | N=64        | N=128       |
| Img→F | OpenCLIP   | .030        | .016        | .009        | .243        | .125        | .062        |
|       | BioMedCLIP | .040        | .021        | .010        | .298        | .156        | .083        |
|       | Merlin     | <b>.780</b> | <b>.696</b> | <b>.608</b> | <b>.989</b> | <b>.968</b> | <b>.927</b> |
| F→Img | OpenCLIP   | .033        | .017        | .009        | .250        | .125        | .061        |
|       | BioMedCLIP | .044        | .021        | .012        | .306        | .156        | .079        |
|       | Merlin     | <b>.776</b> | <b>.687</b> | <b>.594</b> | <b>.988</b> | <b>.965</b> | <b>.920</b> |
| Img→I | OpenCLIP   | .030        | .016        | .010        | .256        | .128        | .061        |
|       | BioMedCLIP | .036        | .017        | .009        | .273        | .141        | .073        |
|       | Merlin     | <b>.352</b> | <b>.253</b> | <b>.174</b> | <b>.796</b> | <b>.663</b> | <b>.532</b> |
| I→Img | OpenCLIP   | .032        | .017        | .008        | .252        | .126        | .064        |
|       | BioMedCLIP | .046        | .024        | .012        | .322        | .169        | .081        |
|       | Merlin     | <b>.384</b> | <b>.277</b> | <b>.194</b> | <b>.854</b> | <b>.706</b> | <b>.564</b> |

Table 8: *Cross-modality retrieval*. We compare performance of OpenCLIP, BioMedCLIP, and Merlin across several settings: retrieving the correct findings section given an image (Img → F), retrieving the correct image given a findings section (F → Img), retrieving the correct impressions section given an image (Img → I), and retrieving the correct image given an impressions section (I → Img). We perform retrieval within pools of sizes N=32, N=64, and N=128.

| Task  | Init | Labels | Split | Recall@1    |             |             | Recall@8    |             |             |
|-------|------|--------|-------|-------------|-------------|-------------|-------------|-------------|-------------|
|       |      |        |       | N=32        | N=64        | N=128       | N=32        | N=64        | N=128       |
| Img→F | I3D  | Report | ✓     | .778        | .692        | .598        | <b>.989</b> | .967        | .921        |
|       |      | Staged | ✗     | .654        | .547        | .449        | .967        | .920        | .844        |
|       |      | Staged | ✓     | .672        | .561        | .457        | .972        | .925        | .848        |
|       |      | MTL    | ✗     | <b>.812</b> | <b>.726</b> | <b>.639</b> | .988        | <b>.969</b> | <b>.937</b> |
|       |      | MTL    | ✓     | .690        | .583        | .468        | .978        | .937        | .867        |
|       |      | MTL    | ✓     | .780        | .696        | .608        | <b>.989</b> | .968        | .927        |
| F→Img | I3D  | Report | ✓     | .775        | .686        | .584        | .991        | <b>.969</b> | .921        |
|       |      | Staged | ✗     | .646        | .539        | .434        | .965        | .913        | .841        |
|       |      | Staged | ✓     | .664        | .555        | .445        | .970        | .923        | .841        |
|       |      | MTL    | ✗     | <b>.801</b> | <b>.718</b> | <b>.626</b> | <b>.988</b> | .968        | <b>.933</b> |
|       |      | MTL    | ✓     | .683        | .571        | .455        | .980        | .940        | .869        |
|       |      | MTL    | ✓     | .776        | .687        | .594        | <b>.988</b> | .965        | .920        |
| Img→I | I3D  | Report | ✓     | .364        | .265        | .187        | <b>.812</b> | <b>.681</b> | <b>.549</b> |
|       |      | Staged | ✗     | .307        | .220        | .159        | .737        | .590        | .449        |
|       |      | Staged | ✓     | .328        | .228        | .163        | .780        | .634        | .500        |
|       |      | MTL    | ✗     | <b>.372</b> | <b>.275</b> | <b>.196</b> | .799        | .667        | .543        |
|       |      | MTL    | ✓     | .288        | .202        | .131        | .740        | .592        | .453        |
|       |      | MTL    | ✓     | .352        | .253        | .174        | .796        | .663        | .532        |
| I→Img | I3D  | Report | ✓     | .382        | .274        | .192        | .850        | <b>.709</b> | <b>.574</b> |
|       |      | Staged | ✗     | .324        | .234        | .161        | .770        | .616        | .490        |
|       |      | Staged | ✓     | .348        | .246        | .168        | .811        | .672        | .523        |
|       |      | MTL    | ✗     | <b>.400</b> | <b>.294</b> | <b>.216</b> | .817        | .698        | .568        |
|       |      | MTL    | ✓     | .289        | .200        | .127        | .779        | .613        | .460        |
|       |      | MTL    | ✓     | .384        | .277        | .194        | <b>.854</b> | .706        | .564        |

Table 9: *Cross-modality retrieval ablation study*. We compare retrieval performance across three axes of weight initializations, methods for incorporating EHR and radiology reports into training, and splitting or using the full findings during training.

| Encoder          | Init | Labels | %Tr  | CKD                   | DM                    | HTN                   | IHD                   | CVD                   | OST                   | Average               |
|------------------|------|--------|------|-----------------------|-----------------------|-----------------------|-----------------------|-----------------------|-----------------------|-----------------------|
|                  |      |        |      | 14/46<br>100%         | 9/46<br>80/474        | 11/34<br>111/404      | 9/49<br>69/518        | 20/52<br>136/504      | 10/47<br>68/527       |                       |
| Swin Transformer | -    | -      | 10%  | .46 [.40, .50]        | .70 [.66, .75]        | .43 [.39, .48]        | .53 [.49, .57]        | .53 [.50, .57]        | .56 [.51, .61]        | .54 [.52, .55]        |
| ResNet152        | -    | -      | 10%  | .53 [.48, .58]        | .66 [.61, .71]        | .60 [.55, .64]        | .49 [.45, .54]        | .58 [.54, .62]        | .50 [.44, .56]        | .56 [.54, .58]        |
| ↓                | I3D  | -      | 10%  | .72 [.67, .76]        | <b>.72 [.67, .76]</b> | .67 [.63, .71]        | .67 [.63, .71]        | .67 [.64, .71]        | .66 [.61, .71]        | .68 [.67, .70]        |
|                  | I3D  | EHR    | 10%  | .58 [.53, .63]        | .64 [.59, .69]        | .47 [.42, .51]        | <b>.75 [.71, .78]</b> | .69 [.65, .72]        | .62 [.57, .67]        | .62 [.60, .64]        |
| (Merlin)         | I3D  | MTL    | 10%  | <b>.74 [.70, .78]</b> | .70 [.66, .75]        | <b>.69 [.65, .73]</b> | .70 [.67, .74]        | <b>.73 [.69, .76]</b> | <b>.69 [.65, .73]</b> | <b>.71 [.69, .72]</b> |
| Swin Transformer | -    | -      | 100% | .55 [.50, .59]        | .73 [.68, .77]        | .61 [.57, .65]        | .52 [.48, .56]        | .54 [.49, .57]        | .60 [.55, .66]        | .59 [.57, .61]        |
| ResNet152        | -    | -      | 100% | .63 [.58, .67]        | <b>.74 [.69, .78]</b> | .65 [.61, .69]        | .65 [.61, .69]        | .57 [.54, .61]        | .60 [.55, .66]        | .64 [.62, .66]        |
| ↓                | I3D  | -      | 100% | .74 [.70, .77]        | <b>.74 [.70, .78]</b> | .71 [.67, .75]        | .68 [.64, .72]        | .68 [.64, .71]        | .74 [.69, .78]        | .71 [.70, .73]        |
|                  | I3D  | EHR    | 100% | .76 [.73, .80]        | .72 [.68, .76]        | .74 [.70, .77]        | .74 [.70, .78]        | .73 [.69, .76]        | .68 [.64, .73]        | .73 [.71, .74]        |
| (Merlin)         | I3D  | MTL    | 100% | <b>.77 [.74, .81]</b> | .72 [.68, .76]        | <b>.75 [.72, .79]</b> | <b>.76 [.72, .79]</b> | <b>.74 [.71, .77]</b> | <b>.80 [.76, .84]</b> | <b>.76 [.74, .77]</b> |

Table 10: *Multi-disease 5-year prediction*. We fine-tune Merlin for 5-year disease prediction. All data used in this evaluation, including train, val, and test splits, are held out from pretraining.

| Section                | BLEU ↑ |        | ROUGE-2 ↑ |        | BERT ↑ |        | RadGraph-F1 ↑ |        |
|------------------------|--------|--------|-----------|--------|--------|--------|---------------|--------|
|                        | RadFM  | Merlin | RadFM     | Merlin | RadFM  | Merlin | RadFM         | Merlin |
| Lower thorax           | .001   | .019   | .070      | .332   | .406   | .615   | .020          | .319   |
| Liver and biliary tree | .001   | .269   | .025      | .389   | .328   | .641   | .080          | .380   |
| Gallbladder            | .000   | .006   | .006      | .632   | .534   | .851   | .152          | .721   |
| Spleen                 | .000   | .002   | .004      | .710   | .382   | .853   | .283          | .805   |
| Pancreas               | .000   | .001   | .010      | .700   | .447   | .849   | .091          | .748   |
| Adrenal glands         | .006   | .030   | .067      | .882   | .490   | .942   | .106          | .879   |
| Kidneys and ureters    | .005   | .269   | .040      | .385   | .368   | .654   | .091          | .387   |
| Gastrointestinal tract | .001   | .013   | .037      | .152   | .398   | .531   | .092          | .167   |
| Peritoneal cavity      | .000   | .206   | .005      | .390   | .387   | .702   | .050          | .335   |
| Pelvic organs          | .000   | .233   | .009      | .358   | .328   | .656   | .036          | .432   |
| Vasculature            | .000   | .026   | .004      | .485   | .232   | .748   | .006          | .548   |
| Lymph nodes            | .003   | .023   | .119      | .601   | .502   | .775   | .031          | .542   |
| Musculoskeletal        | .001   | .046   | .018      | .303   | .449   | .689   | .008          | .293   |
| Full report            | .000   | .102   | .011      | .262   | .224   | .588   | .008          | .293   |

Table 11: *Radiology report generation*. We compare Merlin and RadFM for generating radiology report sections corresponding to various anatomies, as well as the full findings.

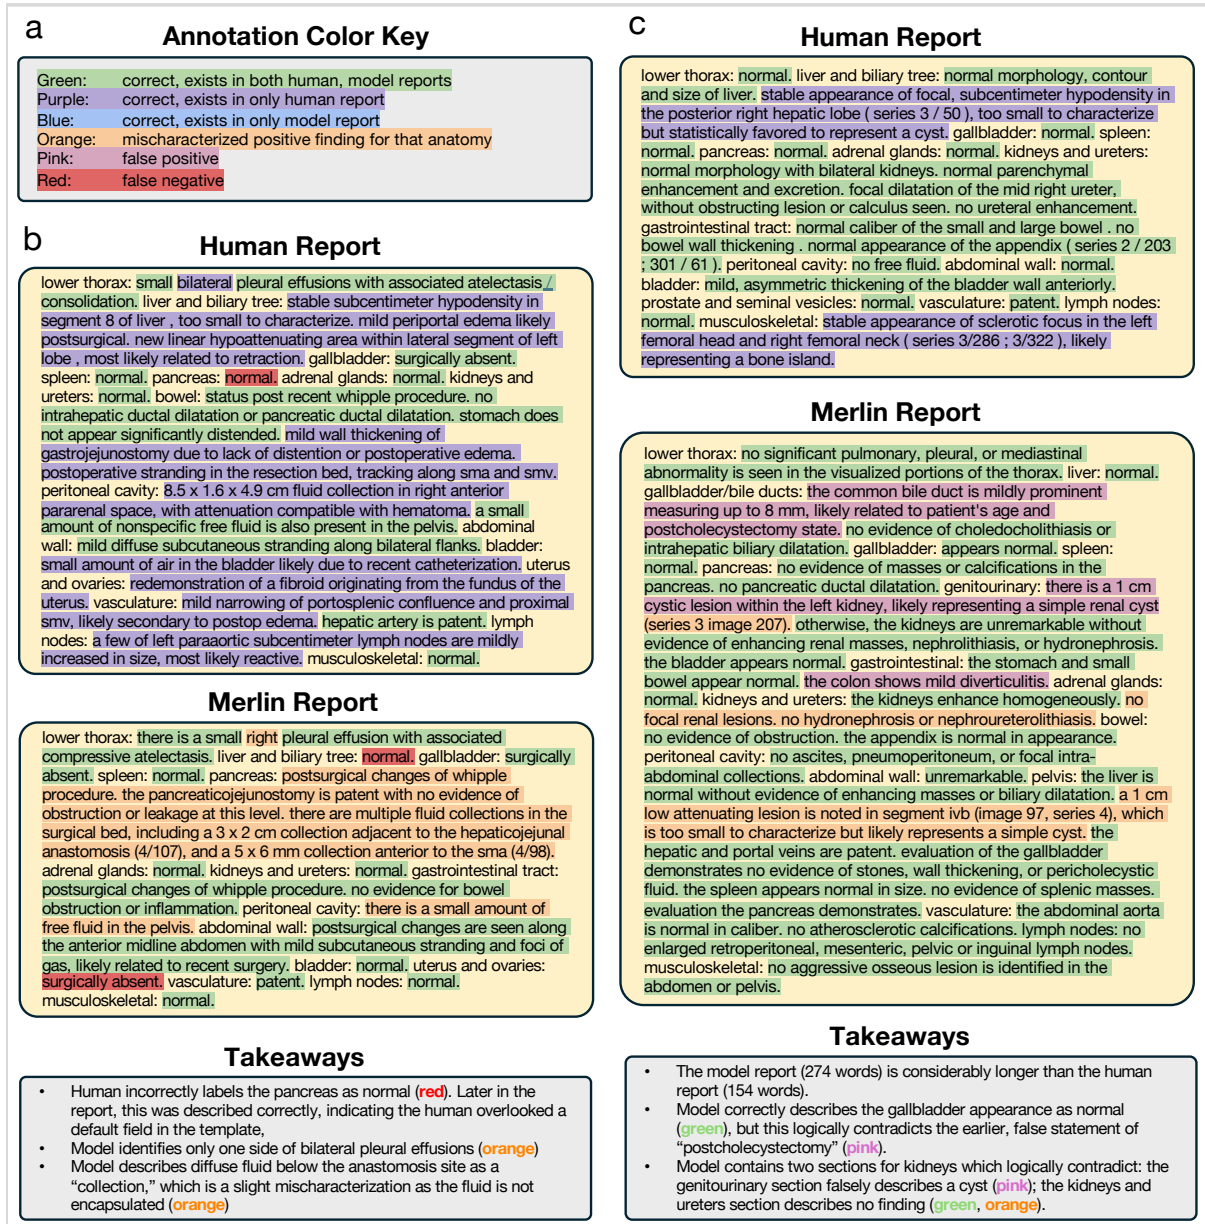

Figure 8: Radiology report generation. (a) As shown in the annotation color key, we annotate individual phrases to be correct, mischaracterized, false positive, or false negative. (b - c) We provide dense annotations of two sets of human and Merlin generated reports.
